# Supplementary material
Source: PubMed Central journal article supplement (PMC8157931)
Supplement: pnas.2022491118.sapp.pdf [file pnas.2022491118.sapp.pdf]

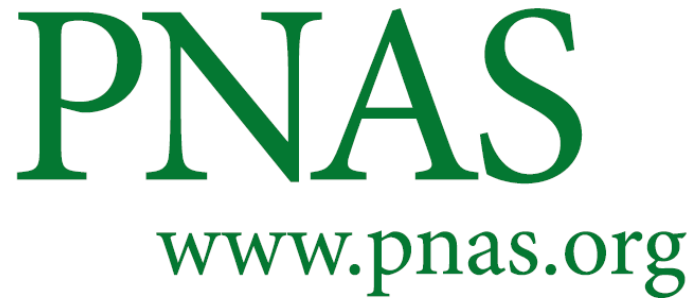

Supplementary information for

**Intolerance of uncertainty modulates brain-to-brain synchrony during politically polarized perception**

Jeroen M. van Baar<sup>1</sup>, David J. Halpern<sup>2,3</sup>, & Oriel FeldmanHall<sup>1,4\*</sup>

<sup>1</sup>Department of Cognitive, Linguistic, and Psychological Sciences, Brown University, 190 Thayer Street, Providence, RI 02912, United States

<sup>2</sup>Department of Psychology, New York University, 6 Washington Place, New York, NY 10002, United States

<sup>3</sup>Department of Psychology, University of Pennsylvania, 425 S. University Avenue, Philadelphia, PA 19104, United States

<sup>4</sup>Carney Institute for Brain Science, Brown University, 164 Angell Street, Providence, RI 02912, United States

\*Corresponding author at 349 Metcalf Hall, 190 Thayer Street, Providence, RI 02912, United States

**Email:** [Oriel.FeldmanHall@Brown.edu](mailto:Oriel.FeldmanHall@Brown.edu)

**This PDF file includes:**

Supplementary Results  
Tables S1 to S4  
Figures S1 to S6  
SI References

## Supplementary Results

**Videos elicit synchronized BOLD responses across all participants.** As a manipulation check, we first ran a conventional ISC analysis (1) to ensure that our stimuli elicited robust neural synchrony between all participants, which revealed significant involvement of brain regions associated with processing narrative video content, including visual and auditory cortex, medial and lateral prefrontal cortex, and medial temporal gyrus (33, 87; Figure S1).

***Intolerance of uncertainty outperforms need for closure as a predictor of neural synchrony.***

Our experimental results reveal a tight relationship between intolerance of uncertainty and the processing of political information in the brain. However, IUS is not the only measure of cognitive rigidity. Indeed, recent work shows that many different ‘cognitive personality traits’ may affect political thought (4). Although we did not collect data on most of these metrics, we did include a short need for closure scale (NFC; 14, 85) in our survey battery. As expected for such similar constructs, there was a medium correlation between intolerance of uncertainty and need for closure ( $r = 0.45$ ,  $p < 0.001$ ). However, running the same analysis of neural synchrony with joint NFC as a predictor instead of joint IUS did not reveal any gray matter clusters where joint NFC interacted with ideological similarity. In our data, therefore, IUS is the better predictor of neural synchrony during the perception of polarizing political information. Full cross-correlations between IUS, NFC, Interpersonal Reactivity Index (IRI), and Social Dominance Orientation (SDO) are shown in Figure S4.

**Table S1***Main effect of ideology similarity:*

|   | Region name                     | Size (k) | Peak MNI |    |     | Peak $\beta$ | Peak $p$ |
|---|---------------------------------|----------|----------|----|-----|--------------|----------|
|   |                                 |          | x        | y  | z   |              |          |
| 1 | Temporal pole (L)               | 9        | -54      | 21 | -15 | 0.52         | < 0.001  |
| 2 | Medial orbitofrontal cortex (R) | 6        | 12       | 24 | -21 | 0.44         | < 0.001  |

*Interaction effect of ideology similarity and joint IUS:*

|    | Region name                  | Size (k) | Peak MNI |     |    | Peak $\beta$ | Peak $p$ |
|----|------------------------------|----------|----------|-----|----|--------------|----------|
|    |                              |          | x        | y   | z  |              |          |
| 1  | Area MT (L)                  | 97       | -36      | -75 | 18 | 2.02         | < 0.001  |
| 2  | Frontal eye fields (R)       | 49       | 39       | 0   | 48 | 2.30         | < 0.001  |
| 3  | Area MT (R)                  | 46       | 39       | -69 | 21 | 2.16         | < 0.001  |
| 4  | Temporoparietal junction (R) | 38       | 60       | -45 | 36 | 1.89         | < 0.001  |
| 5  | Frontal eye fields (L)       | 26       | -33      | 3   | 51 | 1.73         | < 0.001  |
| 6  | Orbitofrontal cortex (R)     | 13       | 36       | 33  | -9 | 2.15         | < 0.001  |
| 7  | Temporoparietal junction (L) | 12       | -54      | -48 | 36 | 2.16         | < 0.001  |
| 8  | Precuneus                    | 10       | -6       | -42 | 45 | 1.95         | < 0.001  |
| 9  | Precuneus                    | 6        | 0        | -54 | 45 | 1.21         | < 0.001  |
| 10 | Frontal eye fields (L)       | 6        | -33      | 0   | 60 | 1.78         | < 0.001  |

**Table S1.** Voxel clusters where significant effects were found in the second IS-RSA, where we regress neural synchrony during video 3 (CNN Debate) onto ideology similarity (standardized), joint IUS, their interaction, and participant random intercepts. Clusters are listed for the main effect of ideology and the interaction effect between ideology and joint IUS. Size (k) refers to the number of voxels in the cluster.

**Table S2***Interaction effect of ideology pair and joint IUS:*

|    | Region name                        | Size<br>( <i>k</i> ) | Peak MNI |          |          | Peak <i>F</i> | Peak <i>p</i> |
|----|------------------------------------|----------------------|----------|----------|----------|---------------|---------------|
|    |                                    |                      | <i>x</i> | <i>y</i> | <i>z</i> |               |               |
| 1  | Area MT (L)                        | 140                  | -36      | -72      | 15       | 29.1          | < 0.001       |
| 2  | Area MT (R)                        | 93                   | 39       | -69      | 21       | 19.6          | < 0.001       |
| 3  | Frontal eye fields (R)             | 45                   | 39       | 0        | 48       | 23.3          | < 0.001       |
| 4  | Temporoparietal junction (L)       | 43                   | -54      | -60      | 27       | 16.0          | < 0.001       |
| 5  | Frontal eye fields (L)             | 40                   | -39      | 3        | 54       | 15.3          | < 0.001       |
| 6  | Dorsomedial prefrontal cortex (R)  | 19                   | 15       | 63       | 30       | 19.6          | < 0.001       |
| 7  | Temporoparietal junction (R)       | 16                   | 60       | -45      | 33       | 11.6          | < 0.001       |
| 8  | Orbitofrontal cortex (R)           | 15                   | 36       | 33       | -9       | 13.3          | < 0.001       |
| 9  | Precuneus (R)                      | 13                   | 6        | -51      | 42       | 10.7          | < 0.001       |
| 10 | Temporoparietal junction (L)       | 11                   | -54      | -48      | 36       | 13.1          | < 0.001       |
| 11 | Orbitofrontal cortex (L)           | 7                    | -33      | 27       | -12      | 12.3          | < 0.001       |
| 12 | Postcentral gyrus (L)              | 7                    | -18      | -33      | 69       | 11.2          | < 0.001       |
| 13 | Dorsolateral prefrontal cortex (R) | 7                    | 27       | 57       | 33       | 10.9          | < 0.001       |
| 14 | Inferior temporal gyrus (R)        | 5                    | 63       | -57      | -12      | 15.4          | < 0.001       |
| 15 | Dorsomedial prefrontal cortex (L)  | 5                    | -18      | 60       | 33       | 14.0          | < 0.001       |
| 16 | Inferior temporal gyrus (L)        | 5                    | 60       | -51      | -15      | 13.8          | < 0.001       |
| 17 | Cerebellum (L)                     | 5                    | -33      | -57      | -33      | 13.0          | < 0.001       |
| 18 | Dorsomedial PFC (R)                | 5                    | 21       | 57       | 36       | 11.6          | < 0.001       |
| 19 | Intraparietal sulcus (L)           | 5                    | -27      | -72      | 39       | 9.8           | < 0.001       |

**Table S2.** *Voxel clusters where significant effects were found in the ANCOVA where neural synchrony during video 3 (CNN Debate) was regressed onto ideology pair (categorical variable, 3 levels, with CL as reference level), joint IUS, their interaction, and participant random intercepts. Clusters are listed for the interaction effect between ideology pair and joint IUS. Size (*k*) refers to the number of voxels in the cluster.*

**Table S3**

| ROI       | Peak MNI |     |    | Term                               | $\beta$ | SE    | t     | df    | p       |     |
|-----------|----------|-----|----|------------------------------------|---------|-------|-------|-------|---------|-----|
|           | x        | y   | z  |                                    |         |       |       |       |         |     |
| ITPJ      | -54      | -48 | 36 | Ideology similarity                | 0.132   | 0.032 | 4.15  | 840.8 | < 0.001 | *** |
|           |          |     |    | Joint IUS                          | 0.036   | 0.059 | 0.60  | 53.1  | 0.549   |     |
|           |          |     |    | Ideology similarity ×<br>Joint IUS | 0.185   | 0.033 | 5.64  | 839.8 | < 0.001 | *** |
| rOFC      | 36       | 33  | -9 | Ideology similarity                | 0.114   | 0.030 | 3.78  | 833.6 | < 0.001 | *** |
|           |          |     |    | Joint IUS                          | 0.146   | 0.067 | 2.17  | 60.9  | 0.034   | *   |
|           |          |     |    | Ideology similarity ×<br>Joint IUS | 0.164   | 0.031 | 5.22  | 832.8 | < 0.001 | *** |
| Precuneus | -6       | -42 | 45 | Ideology similarity                | 0.054   | 0.032 | 1.70  | 838.6 | 0.090   |     |
|           |          |     |    | Joint IUS                          | -0.083  | 0.063 | -1.33 | 55.3  | 0.188   |     |
|           |          |     |    | Ideology similarity ×<br>Joint IUS | 0.156   | 0.033 | 4.73  | 837.7 | < 0.001 | *** |

**Table S3.** Ideology similarity and joint IUS interact to drive neural synchrony during video 3 (CNN Debate) in the brain regions shown in Figure 3. Regression equation:  $z_{ij} = \gamma + X_{ij}\beta + \alpha_i + \alpha_j + \epsilon_{ij}$  where  $z_{ij}$  is the neural synchrony between participants  $i$  and  $j$  standardized within ROI,  $X_{ij}$  contains main effects ideology similarity (continuous; standardized), joint IUS (standardized), and their interaction, and  $\alpha$  are random subject intercepts. \*  $p < 0.05$ , \*\*\*  $p < 0.001$ .

**Table S4**

| ROI  | Peak MNI |     |    | Term                             | $\beta$ | SE    | t     | df     | p       |     |  |
|------|----------|-----|----|----------------------------------|---------|-------|-------|--------|---------|-----|--|
|      | x        | y   | z  |                                  |         |       |       |        |         |     |  |
| rOFC | 36       | 33  | -9 | Conservative pair                | -0.022  | 0.123 | -0.18 | 50.3   | 0.862   |     |  |
|      |          |     |    | Liberal pair                     | 0.310   | 0.122 | 2.54  | 48.2   | 0.014   | *   |  |
|      |          |     |    | Joint IUS                        | -0.002  | 0.067 | -0.03 | 121.0  | 0.978   |     |  |
|      |          |     |    | Conservative pair ×<br>Joint IUS | 0.211   | 0.053 | 3.98  | 1715.8 | < 0.001 | *** |  |
|      |          |     |    | Liberal pair ×<br>Joint IUS      | 0.415   | 0.057 | 7.24  | 1709.2 | < 0.001 | *** |  |
|      |          |     |    |                                  |         |       |       |        |         |     |  |
| rTPJ | 60       | -45 | 33 | Conservative pair                | -0.221  | 0.143 | -1.55 | 46.2   | 0.129   |     |  |
|      |          |     |    | Liberal pair                     | 0.541   | 0.142 | 3.82  | 45.0   | < 0.001 | *** |  |
|      |          |     |    | Joint IUS                        | -0.115  | 0.069 | -1.66 | 193.3  | 0.098   |     |  |
|      |          |     |    | Conservative pair ×<br>Joint IUS | 0.204   | 0.048 | 4.27  | 1710.9 | < 0.001 | *** |  |
|      |          |     |    | Liberal pair ×<br>Joint IUS      | 0.347   | 0.052 | 6.69  | 1715.3 | < 0.001 | *** |  |
|      |          |     |    |                                  |         |       |       |        |         |     |  |

**Table S4.** Ideology pair (categorical) and joint IUS interact to drive neural synchrony during video 3 (CNN Debate) in the brain regions shown in Figure S3. Regression equation:  $z_{ij} = \gamma + X_{ij}\beta + \alpha_i + \alpha_j + \epsilon_{ij}$  where  $z_{ij}$  is the neural synchrony between participants  $i$  and  $j$  standardized within ROI,  $X_{ij}$  contains main effects ideology pair (categorical; reference level CL, i.e. participant pair with a liberal and a conservative), joint IUS (standardized), and their interaction, and  $\alpha$  are random subject intercepts. \*  $p < 0.05$ , \*\*\*  $p < 0.001$ .

Figure S1

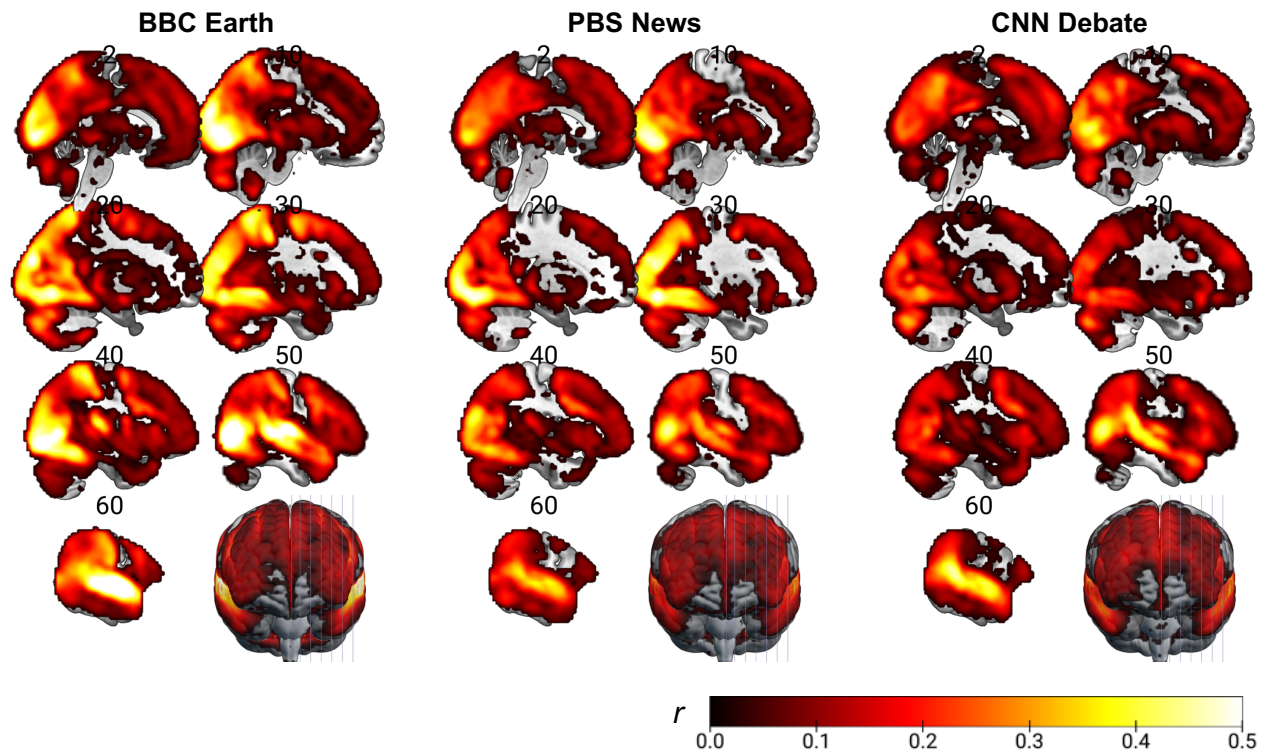

**Figure S1.** Robust overall neural synchrony (inter-subject correlations) were observed for all three videos, with the strongest effects in visual and auditory brain regions. Effects are visualized here for the right hemisphere (MNI x coordinates 2, 10, 20, 30, 40, 50, and 60).  $r$  represents the mean correlation between the activity time course for a subject and the average time course for all other participants. Voxels are thresholded at  $p(\text{FDR}) < 0.001$  based on permutation tests, following the procedure used in earlier work (1).

**Figure S2**

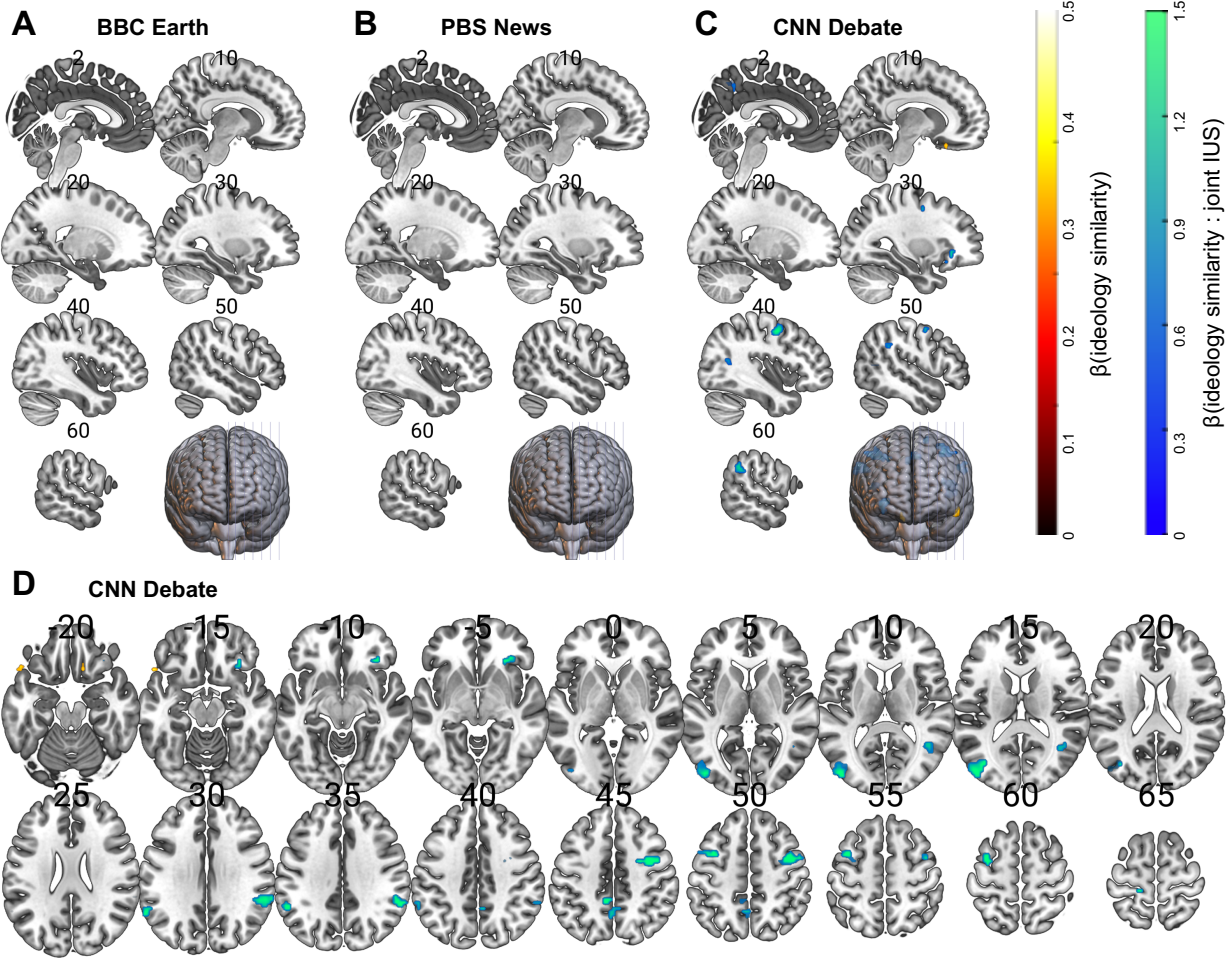

**Figure S2.** Thresholded beta maps of main effect of ideology similarity and interaction effect between ideology similarity and joint intolerance of uncertainty (joint IUS) for videos 1 (A), 2 (B), and 3 (C/D). This analysis reveals that the effect of ideology on neural synchrony during video 3 is largely mediated by intolerance of uncertainty. Axial slices of the debate video beta map (D) added for improved visibility of the active clusters. Numbers represent MNI x coordinates in A-C and z coordinates in D.



**Figure S3**

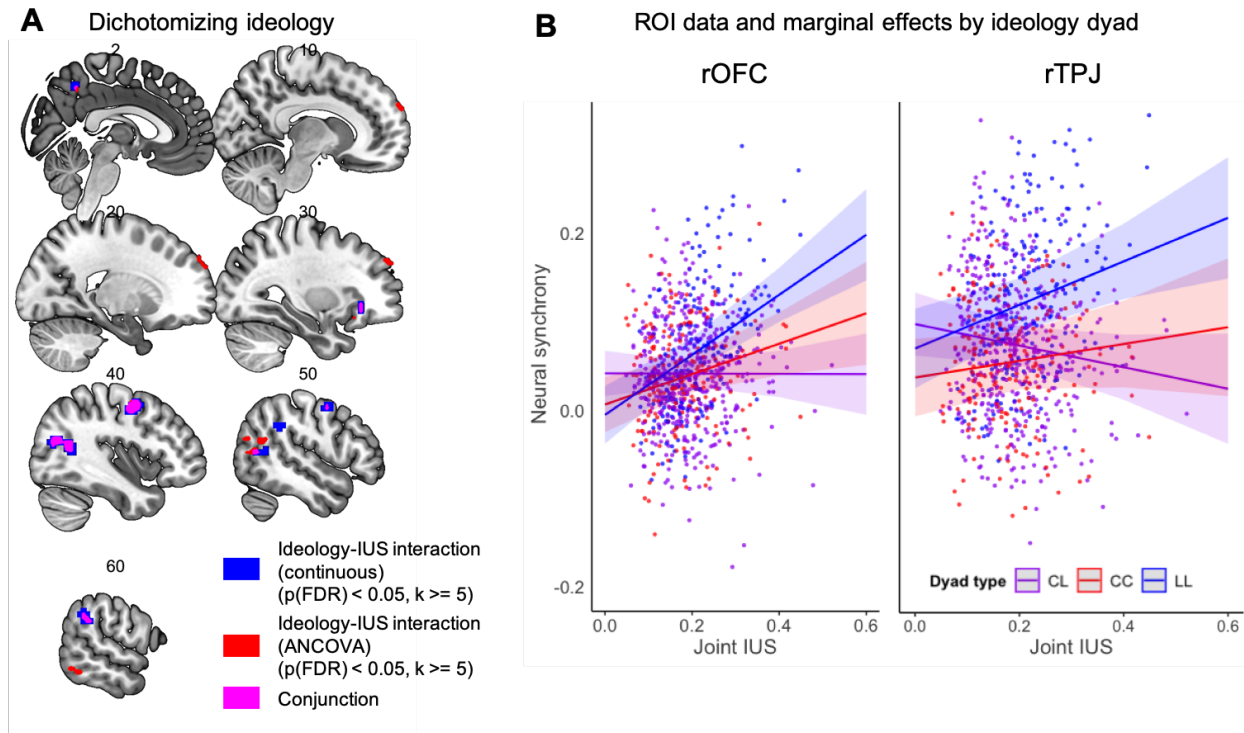

**Figure S3.** ANCOVA results. *A. Comparison between ideology-IUS interaction clusters from the dyadic regression with ideology similarity as continuous predictor (blue) versus the dyadic regression with ideology pair as categorical predictor (ANCOVA; red). Much overlap (magenta) was found between the two activation maps. Slice numbers represent MNI x coordinates. B. ROI data with regression slopes (fixed effects) for joint IUS in the three ideology pair levels CL (between-group), CC (dyad with two conservatives), and LL (dyad with two liberals). In the clusters shown, the joint IUS slope was significantly different at  $p < 0.05$  between CC and CL as well as between LL and CL (Dunnett-adjusted  $p$ -values). Solid lines represent the marginal effects of joint IUS with shaded bands representing 95% confidence intervals. Regression coefficients are reported in Table S4.*

**Figure S4**

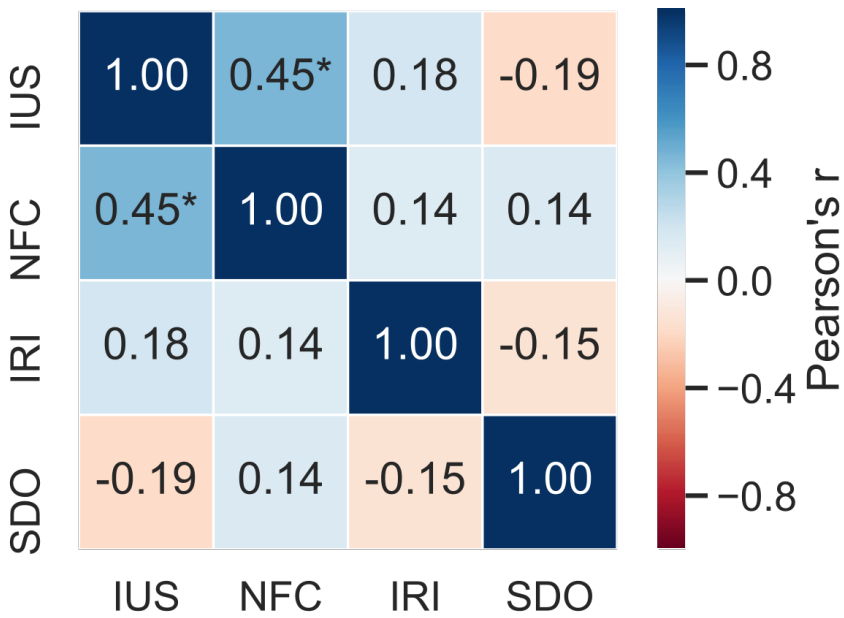

**Figure S4.** Correlations between individual difference measures Intolerance of Uncertainty (IUS), Need for Closure (NFC), Interpersonal Reactivity Index (IRI), and Social Dominance Orientation (SDO). \*  $p < 0.05$ .

**Figure S5**

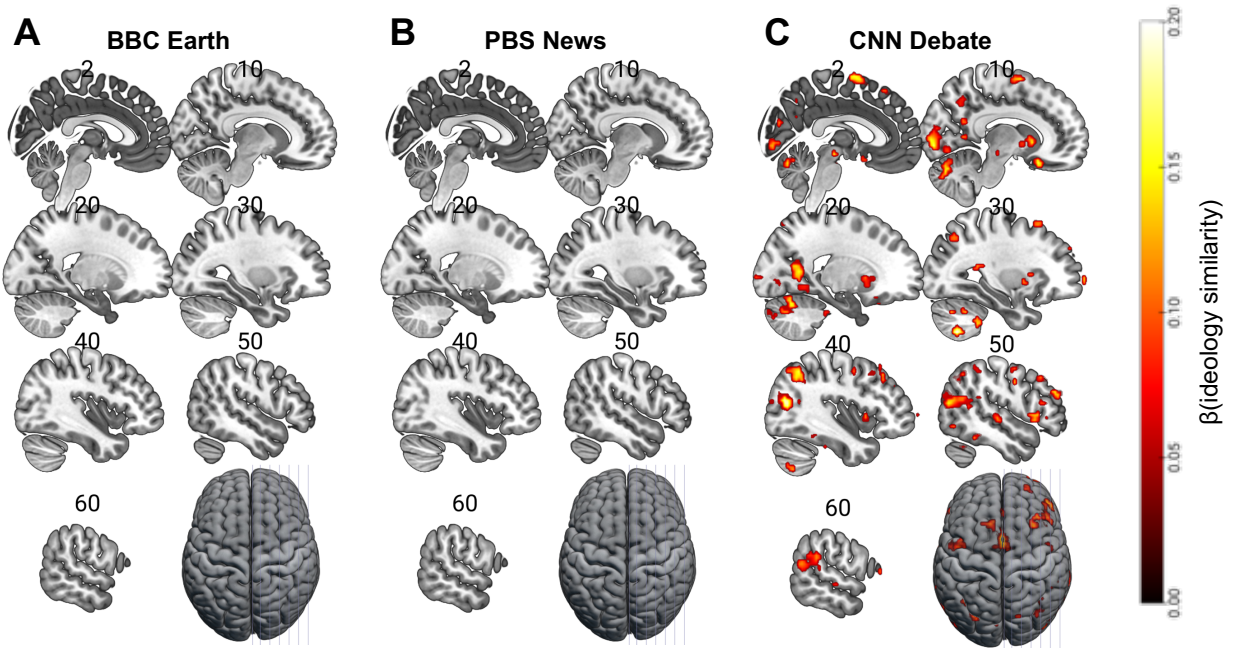

**Figure S5.** Thresholded beta maps for the effect of ideology similarity on neural synchrony after controlling for inter-subject similarity in age, gender, undergraduate student status, sampling source (from the university or from the community), and scan day (participants were scanned across a ~6-month period). Numbers represent MNI x coordinates.

Figure S6

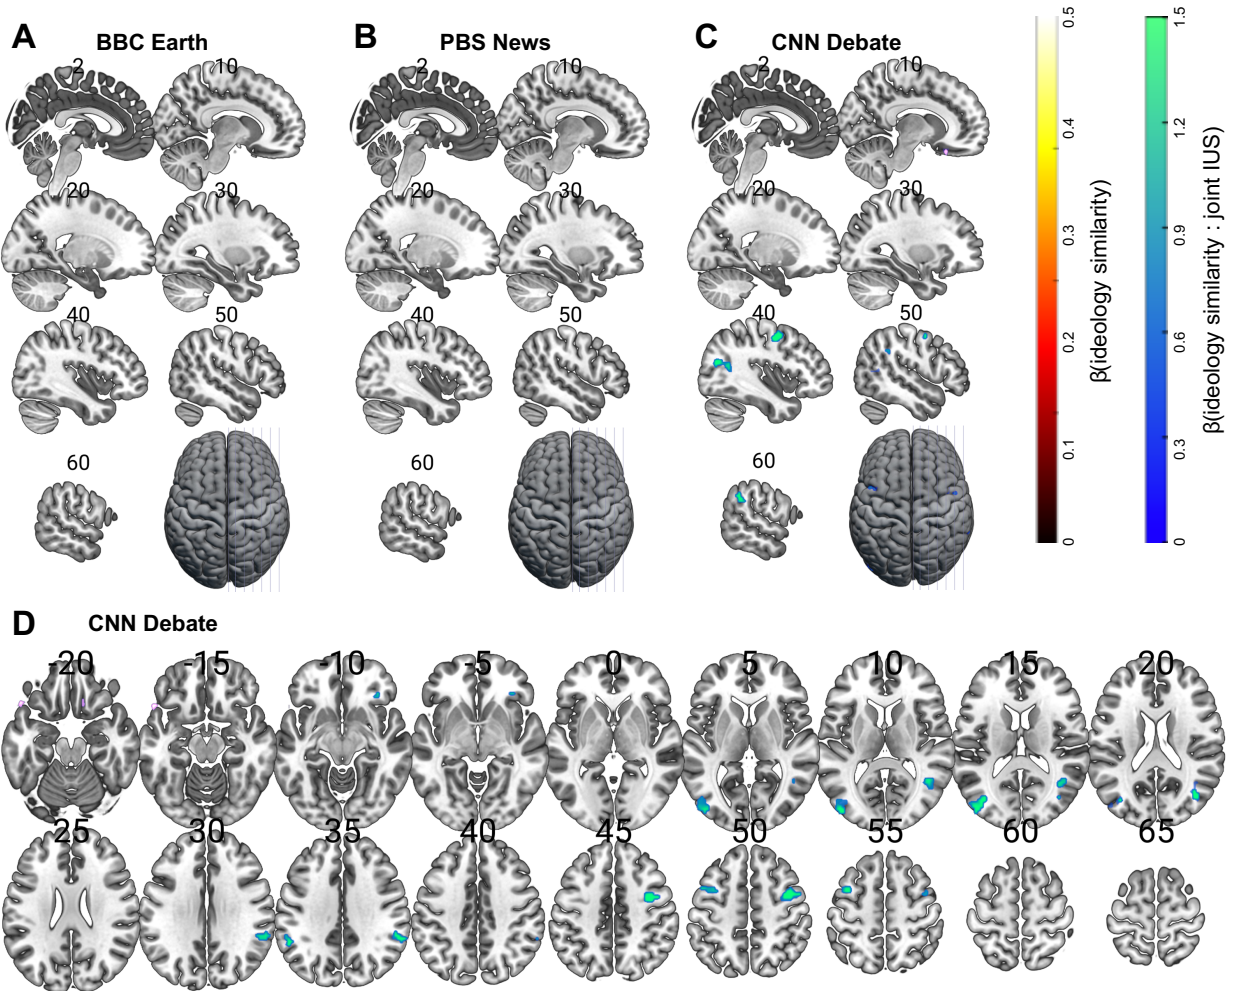

**Figure S6.** Thresholded beta maps for the main effect of ideology similarity, as well as its interaction effect with joint IUS, on neural synchrony after controlling for inter-subject similarity in age, gender, undergraduate student status, sampling source (from the university or from the community), and scan day (participants were scanned across a ~6-month period). Axial slices (D) added for improved visibility of the active clusters for the debate video. Numbers represent MNI x coordinates in A-C and z coordinates in D.

## SI References

1. Y. C. Leong, J. Chen, R. Willer, J. Zaki, Conservative and liberal attitudes drive polarized neural responses to political content. *Proc. Natl. Acad. Sci.*, 1–9 (2020).
2. C. Parkinson, A. M. Kleinbaum, T. Wheatley, Similar neural responses predict friendship. *Nat. Commun.* **9** (2018).
3. U. Hasson, Y. Nir, I. Levy, G. Fuhrmann, R. Malach, Intersubject Synchronization of Cortical Activity During Natural Vision. *Science (80-. )*. **303**, 1634–1640 (2004).
4. L. Zmigrod, I. Eisenberg, P. Bissett, T. W. Robbins, R. Poldrack, The cognitive and perceptual correlates of ideological attitudes: a data-driven approach. *Philos. Trans. R. Soc. B* **376**, 20200424 (2021).
5. D. M. Webster, A. W. Kruglanski, Individual Differences in Need for Cognitive Closure. *J. Personal. Soc. Psychol.* **67**, 1049–1062 (1994).
6. A. Roets, A. Van Hiel, Item selection and validation of a brief, 15-item version of the Need for Closure Scale. *Pers. Individ. Dif.* **50**, 90–94 (2011).
